# Supplementary material for: Evolutionary persistence of DNA methylation for millions of years after ancient loss of a de novo methyltransferase
Source: bioRxiv or medRxiv preprint supplement (doi:10.1101/149385), 2019-07-30

Figure S2. Catania et al.

**A FLAG-Dnmt5 ChIP**

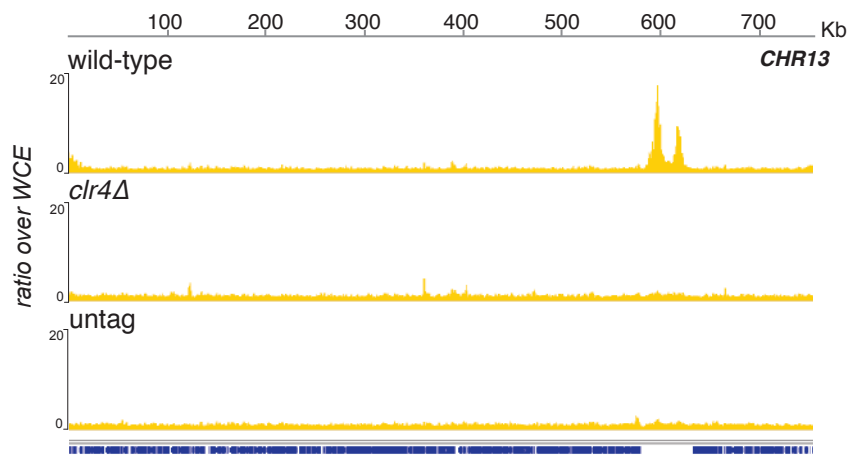

**B**

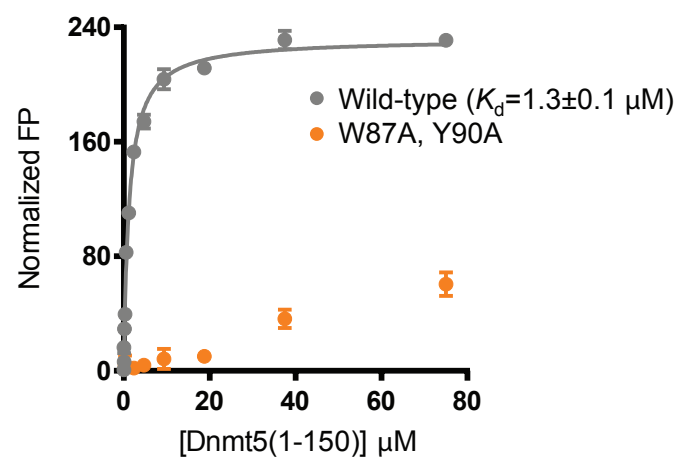

**C**

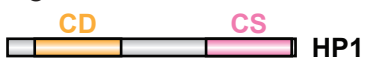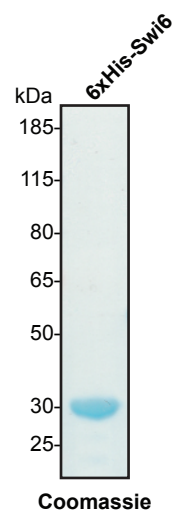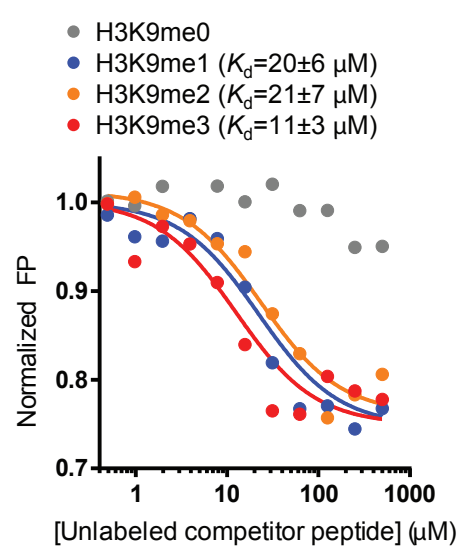

**D**

**Dnmt5 IP/MS**

| CNAG       | peptide# | coverage | name  |
|------------|----------|----------|-------|
| CNAG_07552 | 632      | 70.70%   | Dmt5  |
| CNAG_03458 | 95       | 85.10%   | Swi6  |
| CNAG_04828 | 36       | 84.10%   | H3.3  |
| CNAG_00677 | 34       | 10.90%   | Uhf1  |
| CNAG_01148 | 33       | 38.60%   | Fkbp4 |
| CNAG_05391 | 28       | 26.40%   | Mif2  |
| CNAG_03658 | 23       | 48.30%   |       |
| CNAG_08025 | 12       | 47.00%   | Rnh1  |
| CNAG_00083 | 12       | 39.50%   | Ccc1  |
| CNAG_07756 | 4        | 12.00%   | Cdh1  |
| CNAG_01636 | 2        | 10.30%   | Cpr3  |

**Swi6 IP/MS**

| CNAG       | peptide# | coverage | name |
|------------|----------|----------|------|
| CNAG_00998 | 118      | 42.10%   |      |
| CNAG_03458 | 56       | 56.10%   | Swi6 |
| CNAG_01292 | 39       | 30.50%   | Mit1 |
| CNAG_01306 | 32       | 21.70%   | Mit2 |
| CNAG_01563 | 29       | 18.30%   | Clr3 |
| CNAG_02922 | 18       | 18.10%   | Clr2 |
| CNAG_07807 | 13       | 36.90%   | H4   |
| CNAG_01648 | 13       | 36.90%   | H4   |
| CNAG_07564 | 11       | 12.80%   |      |
| CNAG_06746 | 10       | 37.40%   | H2B  |
| CNAG_01406 | 9        | 40.20%   |      |
| CNAG_04828 | 7        | 27.50%   | H3.3 |
| CNAG_06745 | 7        | 27.50%   | H3   |
| CNAG_06747 | 7        | 18.30%   | H2A  |
| CNAG_00063 | 4        | 11.30%   | Cse4 |
| CNAG_05221 | 3        | 15.90%   | H2Az |

**Uhf1 IP/MS**

| CNAG       | peptide# | coverage | name |
|------------|----------|----------|------|
| CNAG_00677 | 48       | 51%      | Uhf1 |
| CNAG_04828 | 16       | 58.70%   | H3.3 |

**E**

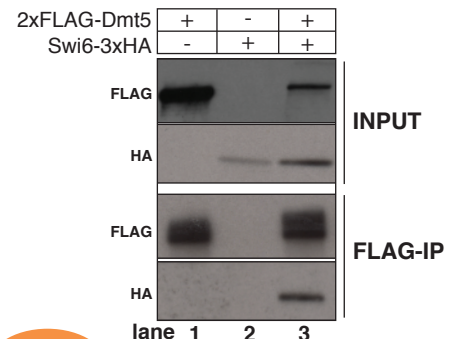

**F**

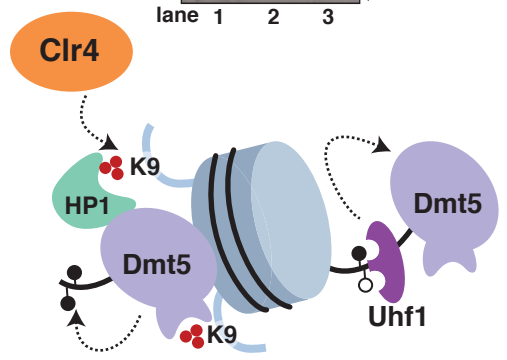

Supplement: Supplementary file [file media-2.pdf]
