# Supplementary material for: Evolutionary persistence of DNA methylation for millions of years after ancient loss of a de novo methyltransferase
Source: bioRxiv or medRxiv preprint supplement (doi:10.1101/149385), 2019-07-30

Figure S4. Catania et al.

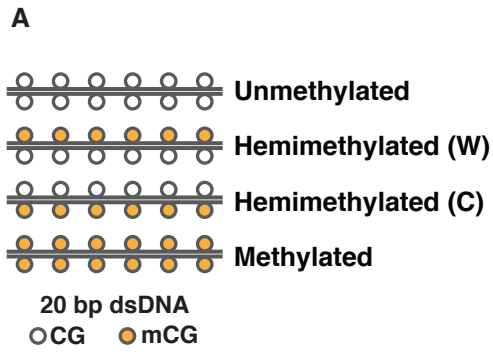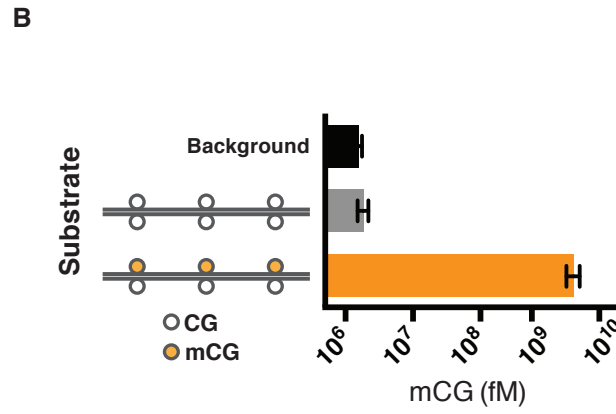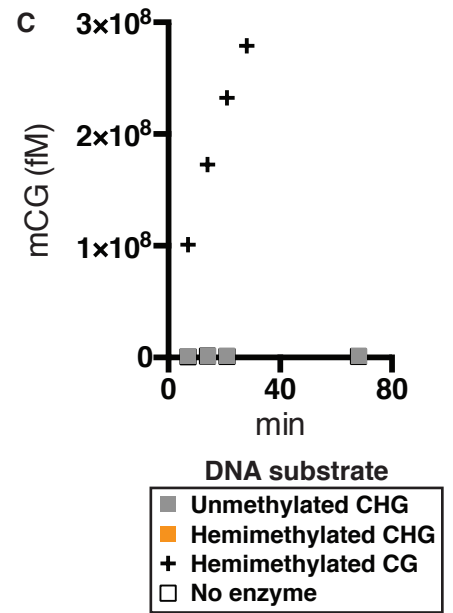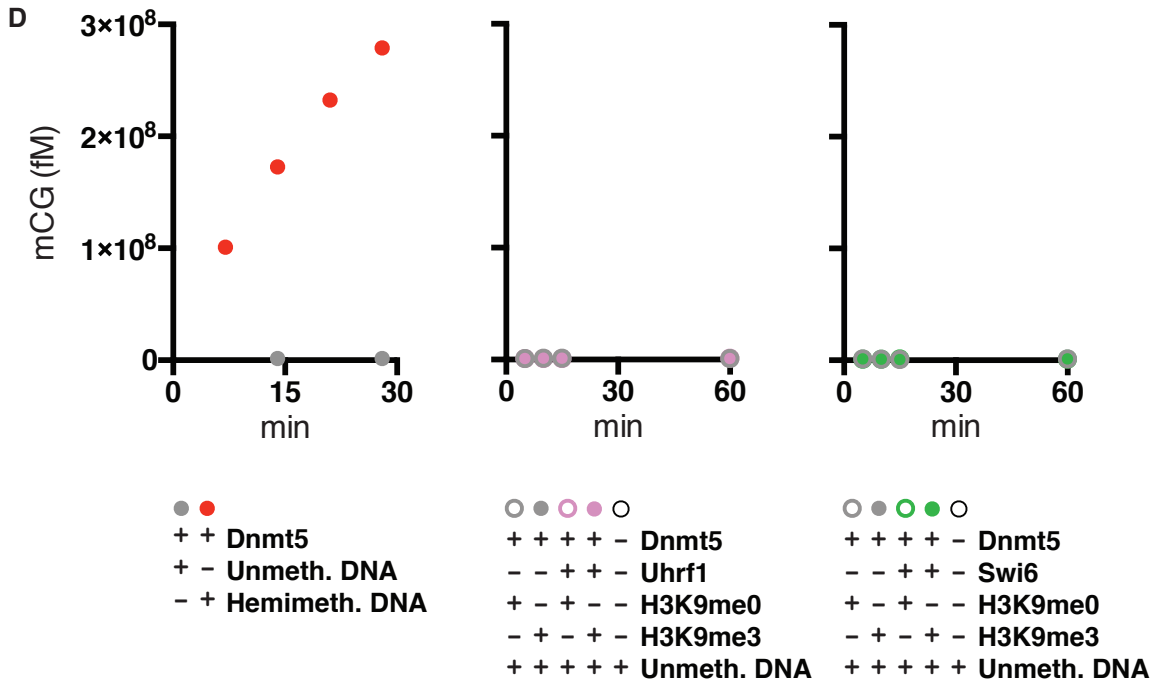

Supplement: Supplementary file [file media-4.pdf]
