# Supplementary material for: Evolutionary persistence of DNA methylation for millions of years after ancient loss of a de novo methyltransferase
Source: bioRxiv or medRxiv preprint supplement (doi:10.1101/149385), 2019-07-30

Figure S7. Catania et al.

**A**

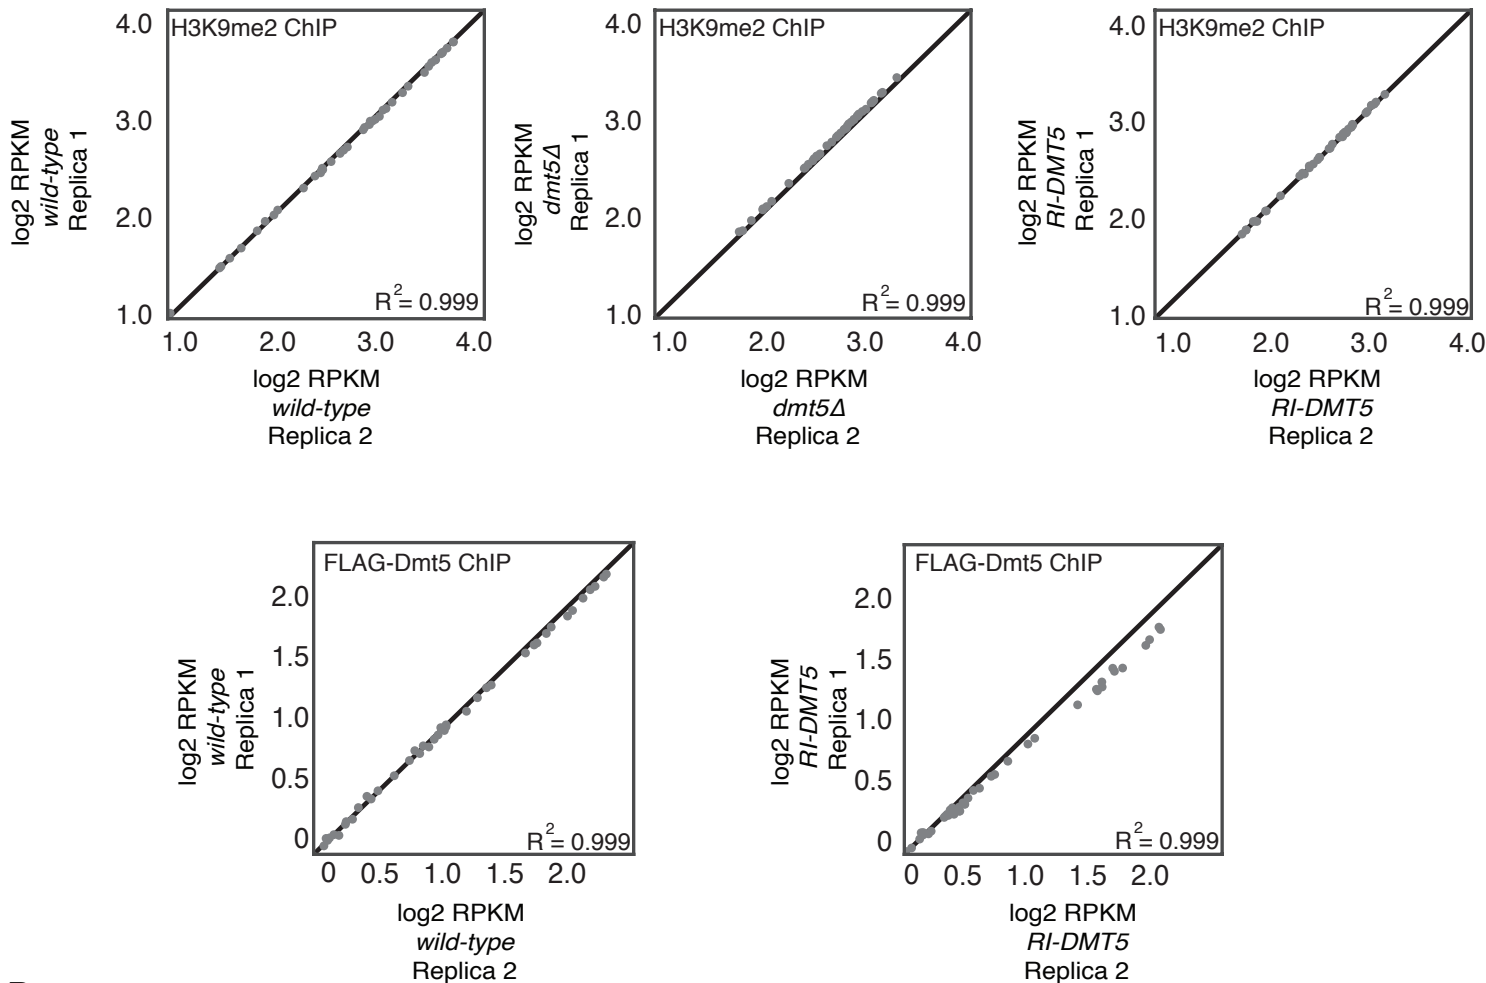

**B**

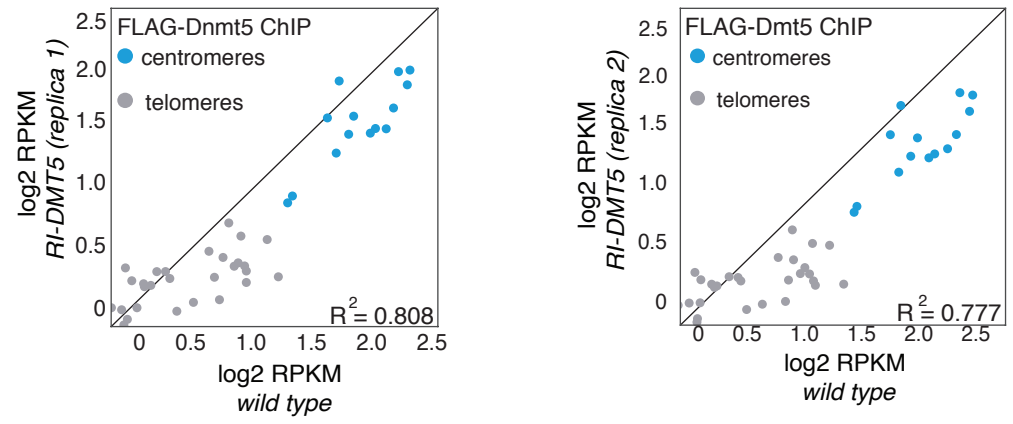

Supplement: Supplementary file [file media-7.pdf]
